# Supplementary material for: A facile and universal strategy for preparation of long wavelength emission carbon dots
Source: Royal Society of Chemistry journal article supplement (doi:10.1039/c7dt03089d), 2017-01-01
Supplement: c7dt03089d1.pdf [file c7dt03089d1.pdf]

## Supporting information

### **A facile and universal strategy for preparation of long wavelength emission carbon dots**

*Yanan Liu,<sup>a</sup> Tianxiang Zhang,<sup>\*b</sup> Rong Wang,<sup>a</sup> Haining Cui <sup>a</sup> and Hongwei Song<sup>\*c</sup>*

*<sup>a</sup>College of Physics, Jilin University, 2699 Qianjin Street, Changchun 130012, China*

*<sup>b</sup>Collaborative Innovation Centre for Optoelectronic Science & Technology, Key Laboratory of Optoelectronic Devices and Systems of Ministry of Education and Guangdong Province, College of Optoelectronic Engineering, Shenzhen University, Shenzhen, 518060, China.*

*E-mail: [zhangtxl4@gmail.com](mailto:zhangtxl4@gmail.com)*

*<sup>c</sup>State Key Laboratory on Integrated Optoelectronics, College of Electronic Science and Engineering, Jilin University, 2699 Qianjin Street, Changchun, 130012, China.*

*Email: [songhw@jlu.edu.cn](mailto:songhw@jlu.edu.cn)*

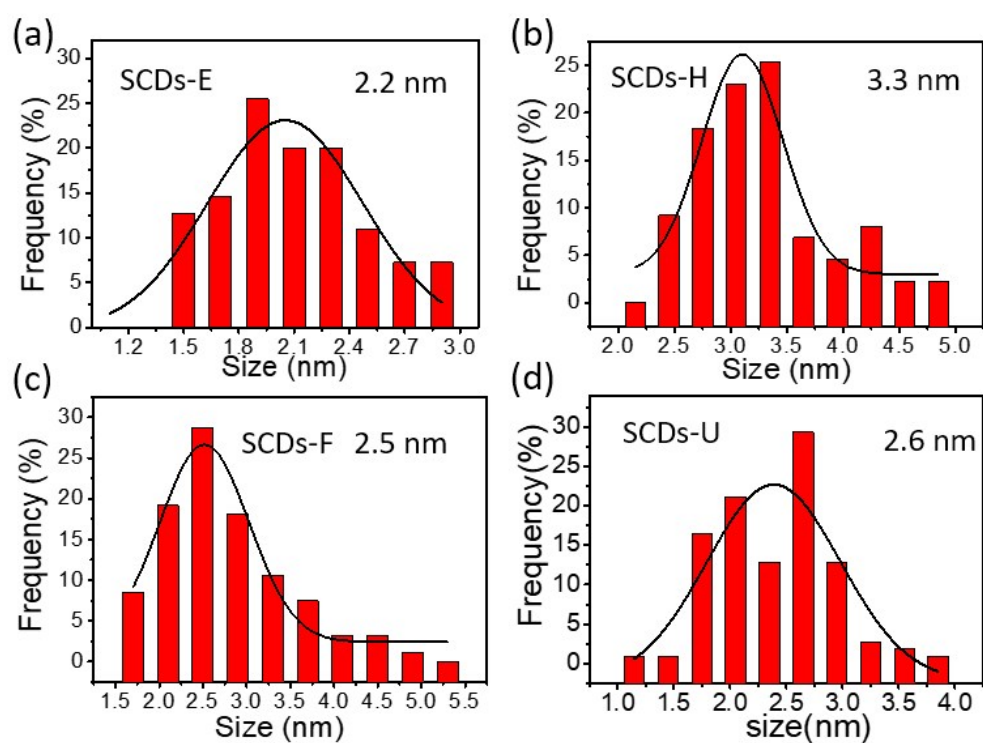

**Figure S1.** The size distribution of SCDs-E, SCDs-H, SCDs-F and SCDs-U. The number in each figure is the average size of different CDs.

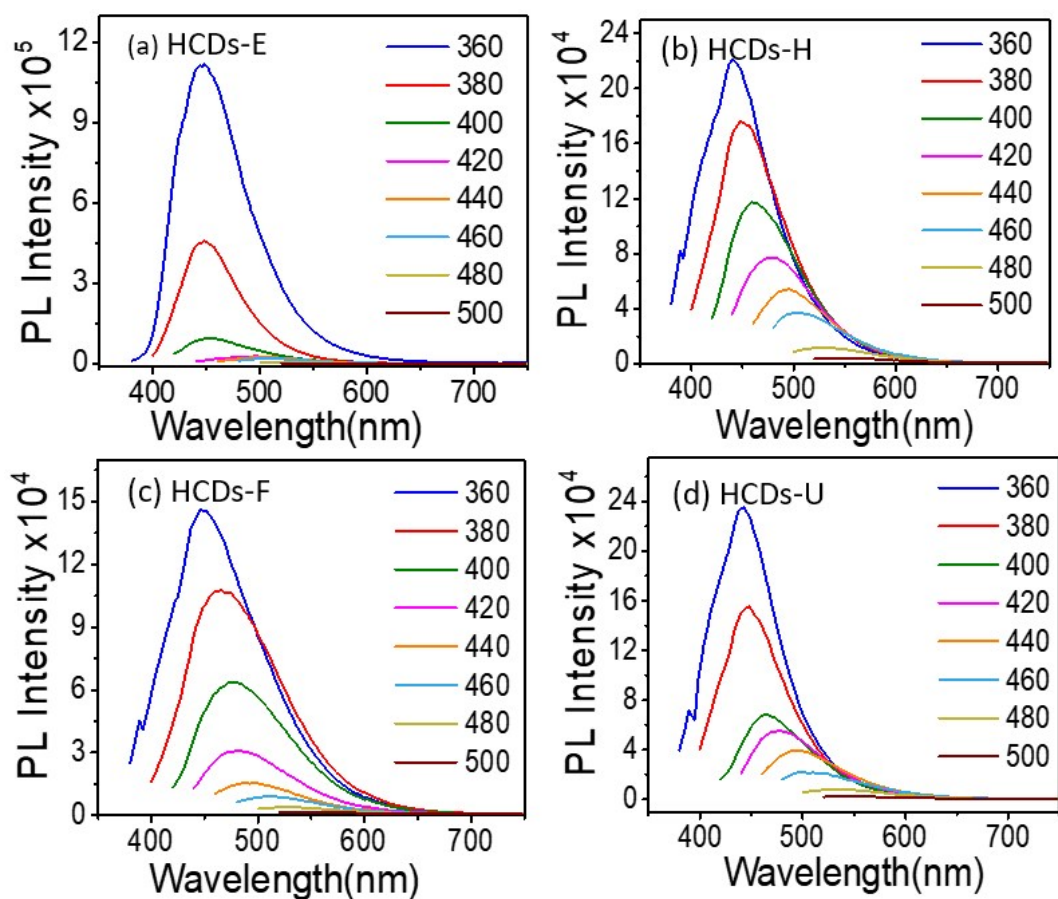

**Figure S2.** (a-d) The photoluminescence (PL) spectra of different HCDs excited from 360 nm to 500 nm.

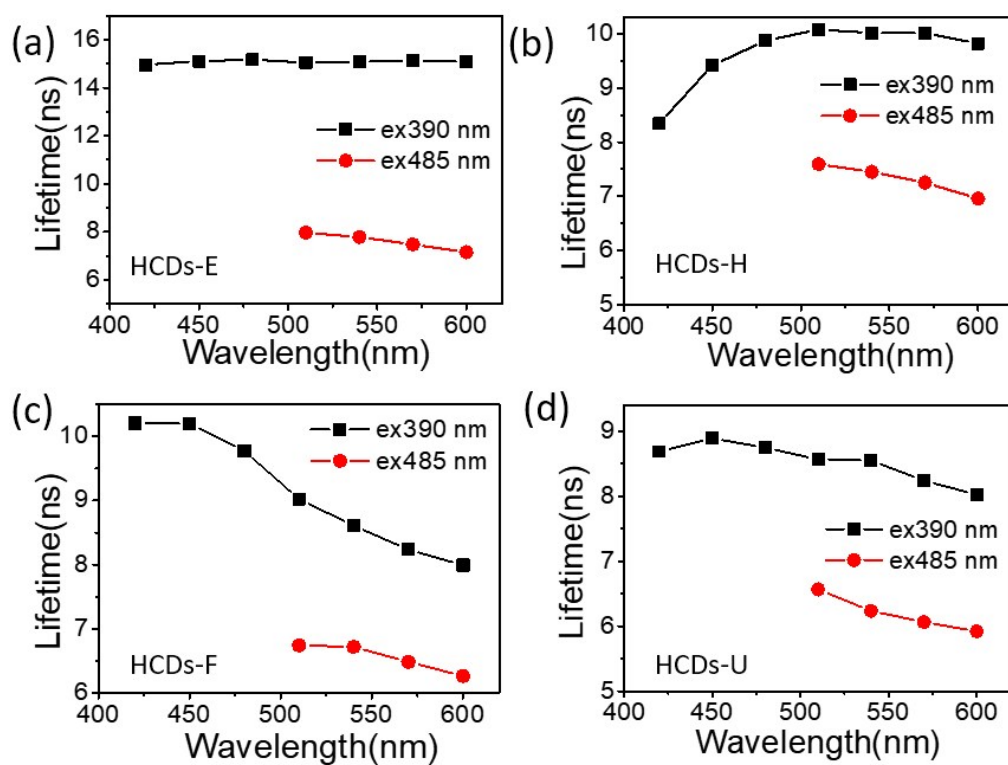

**Figure S3.** (a-d) The lifetime monitored of HCDs excited under 390 nm and 485 nm.
